# Supplementary material
Source: publisher site journal article supplement (https://www.dovepress.com/article/404845)
Supplement: Supplementary file 1 [file get_supplementary_file.php]

## *QUESTIONAIRE*: AWARENESS, ATTITUDE, AND PRACTICE TOWARD HPV SCREENING UPTAKE AMONG FEMALE UNIVERSITY STUDENTS IN ISHAKA WESTERN UGANDA

We are a group of researchers from Kampala International University, Western campus, conducting a studies on the above mentioned topic. Your consent to answer these questions will be highly appreciated; however, you have the right to decline participation. For the purpose of confidentiality, you are requested not to indicate your name on this questionnaire.

**Note**: Tick the correct answer and answer where necessary.

**SOCIODEMOGRAPHIC FEATURES**

1A) Age_______

2A) Level of education

1. Certificate b) Diploma c) Bachelors d) Masters e) Doctoral

3A) Relationship status

1. Single b) Leaving with a sexual partner (married/cohabiting)
2. Separated (widows/divorced)

4A) Religion

1. Protestant b) Catholic c) Muslim d) Pentecostal e) Others

5A) Course of studies

1. Medical b) Non-medical

6A) Ethnicity

1. Baganda b) Foreigners c) Luo d) Lugbara e) Iteso f) Karamajong g) Banyankole h) Banyoro i) Basoga j) Others

**KNOWLEDGE**

**7**B) Human papilloma virus (HPV) is the underlying cause of cervical cancer

1. Yes b) No

8B) HPV is a common sexually-transmitted infection

1. Yes b) No

9A) Are you aware of the different strains of HPV?

1. Yes b) No

10B) If yes, mention any___________________________________

11B) The risk factors for cervical cancer include; (please tick more than one if possible)

1. Multiple sexual partners,
2. HPV
3. Early age of onset of sexual activity,
4. Increasing parity,
5. Prolong use of hormonal contraceptives
6. Current or previous sexually-transmitted infection
7. Smoking

12B) Are you aware cervical screening can help in the early detection of precancerous lesion?

1. Yes b) No

13B) Early detection of precancerous lesion can help in the prevention and treatment of cervical cancer

1. Yes b) No

14B) Precancerous lesions take long time to progress to cervical cancer

1. Yes b) No

15B) Are you aware that vaccine for HPV may prevent development of cervical cancer

1. Yes b) No

16B) Source of information on HPV screening

1. Radio
2. Social media
3. Health care worker
4. Friend
5. News papers and magazine

**ATTITUDE**

17C) Do you feel young women should screen for HPV early?

1. Yes b) No

18C) Do you recommend regular screen for early detection of precancerous lesions?

1. Yes b) No

19C) Do you feel young women should be vaccinated for HPV?

1. Yes b) No

**PRACTICES**

20D) Do you smoke?

1. Yes b) No

21D) Have you previously gone for Pap examination?

1. Yes b) No

22D) Have you been vaccinated against HPV?

1. Yes b) No

23D) Have you had more than one sex partners?

1. Yes b) No

24D) Do you use condom during sex?

1. Yes b) No
